# Supplementary material for: Incidence of typhoid and paratyphoid fever in Bangladesh, Nepal, and Pakistan: results of the Surveillance for Enteric Fever in Asia Project
Source: PubMed Central journal article supplement (PMC9210262; doi:10.1016/s2214-109x(22)00119-x), 2022-06-14
Supplement: mmc1.pdf [file mmc1.pdf]

# THE LANCET

## Global Health

### Supplementary appendix

This appendix formed part of the original submission and has been peer reviewed. We post it as supplied by the authors.

Supplement to: Garrett DO, Longley AT, Aiemjoy K, et al. Incidence of typhoid and paratyphoid fever in Bangladesh, Nepal, and Pakistan: results of the Surveillance for Enteric Fever in Asia Project. *Lancet Glob Health* 2022; **10**: e978–88.

## Supplementary Methods

The sensitivity of blood culture was estimated to be 0.59 (95% confidence interval [CI]: 0.54–0.64) based on a recent meta-analysis by Antillon *et al.*<sup>i</sup>

The adjustment for consent and blood culture utilization was estimated by dividing the number of eligible persons who consented and provided a blood sample by the number of participants who were eligible for study enrollment at the SEAP hospitals in each age strata. These probabilities were estimated separately for inpatient and outpatient enrollment (Supplementary Table 2).

The adjustment for care-seeking was estimated from the health care utilization survey, using the probability of individuals with suspected enteric fever (defined as  $\geq 3$  consecutive days of reported fever in a 7-day period) seeking care or being hospitalized with febrile illness at a study site. Generalized estimating equations were used to account for clustering by geographic sampling unit.<sup>ii</sup> Age-specific probabilities were calculated for outpatient care-seeking, and overall probabilities (not age-specific) were used for inpatient care-seeking (Supplementary Table 2).

For the last adjustment, differential care-seeking, we created a wealth index using a principal components analysis<sup>iii</sup> incorporating the following assets: electricity and ownership of radio, television, landline telephone, mobile phone, computer, watch, bicycle, motorcycle, car, and bank account for study participants in both the health care utilization survey and the clinical surveillance studies. We then used inverse probability weighting approach to account for differences in care-seeking according to wealth and household education, using male head of household education as the indicator variable. We generated propensity scores based on the probability of being blood culture-positive for enteric fever according to education level of the male head of household and household wealth index in the clinical data. We then applied these scores as inverse weights to the health care utilization data to generate estimates that account for the care-seeking behavior adjusted for education and wealth. In Nepal, we combined the <2 and 2-4 differential care seeking adjustment because there were too few households in each age strata to calculate stratified adjustments (Supplementary Table 2).

## Supplementary Tables

Supplementary Table 1. Laboratory network sites conducting blood culture surveillance for the Surveillance for Enteric Fever in Asia Project (SEAP)— Bangladesh, Nepal, and Pakistan, 2016-2019

| Country                              | Laboratory Network Sites                        |
|--------------------------------------|-------------------------------------------------|
| Bangladesh                           | Popular Diagnostic Center - Dhanmondi           |
|                                      | Popular Diagnostic Center - Mirpur              |
|                                      | Popular Diagnostic Center - Shamoly             |
| Nepal                                | Alka Hospital                                   |
|                                      | Nepal Medical College                           |
|                                      | Kathmandu Model Hospital                        |
|                                      | Bir Hospital                                    |
|                                      | Helping Hands Clinic                            |
|                                      | Nepal Police Hospital                           |
| Pakistan                             | Kanti Children Hospital                         |
|                                      | Nepal Army Hospital                             |
|                                      | AKU Secondary Hospital Garden Collection Unit   |
|                                      | AKU Secondary Hospital Kharadar Collection Unit |
| AKUH Main Laboratory Collection Unit |                                                 |
| KGH Hospital Lab / Lab Network       |                                                 |

Supplementary Table 2. Outpatient and inpatient adjustment factors used to estimate incidence of typhoid and paratyphoid fevers by age and study site, Surveillance for Enteric Fever in Asia Project (SEAP) — Bangladesh, Nepal, and Pakistan, 2016-2019

|                                                          | <b>Adjustment 1:<br/>Blood Culture<br/>Sensitivity</b> | <b>Adjustment 2:<br/>Study Consent</b> | <b>Adjustment 3:<br/>Care-Seeking</b> | <b>Adjustment 4:<br/>Differential Care-<br/>Seeking</b> |
|----------------------------------------------------------|--------------------------------------------------------|----------------------------------------|---------------------------------------|---------------------------------------------------------|
| <b>Outpatient</b>                                        |                                                        |                                        |                                       |                                                         |
| <b>Bangladesh</b>                                        |                                                        |                                        |                                       |                                                         |
| <2 years                                                 | 0.59                                                   | 0.666 DSH;<br>0.520 SSF                | 0.221                                 | 0.234                                                   |
| 2 - 4 years                                              | 0.59                                                   | 0.738 DSH;<br>0.556 SSF                | 0.188                                 | 0.195                                                   |
| 5 - 15 years                                             | 0.59                                                   | 0.751 DSH;<br>0.575 SSF                | 0.072                                 | 0.078                                                   |
| Total                                                    | 0.59                                                   | 0.723 DSH;<br>0.553 SSF                | 0.128                                 | 0.135                                                   |
| <b>Dhulikhel Hospital, Kathmandu University Hospital</b> |                                                        |                                        |                                       |                                                         |
| <2 years                                                 | 0.59                                                   | 0.934                                  | 0.143                                 | 0.213                                                   |
| 2 - 4 years                                              | 0.59                                                   | 0.972                                  | 0.189                                 | 0.213                                                   |
| 5 - 15 years                                             | 0.59                                                   | 0.964                                  | 0.123                                 | 0.137                                                   |
| 16-25 years                                              | 0.59                                                   | 0.950                                  | 0.128                                 | 0.155                                                   |
| >25 years                                                | 0.59                                                   | 0.944                                  | 0.087                                 | 0.138                                                   |
| Total                                                    | 0.59                                                   | 0.953                                  | 0.118                                 | 0.156                                                   |
| <b>Kathmandu Medical College and Teaching Hospital</b>   |                                                        |                                        |                                       |                                                         |
| <2 years                                                 | 0.59                                                   | 0.878                                  | 0.060                                 | 0.056                                                   |
| 2 - 4 years                                              | 0.59                                                   | 0.925                                  | 0.067                                 | 0.056                                                   |
| 5 - 15 years                                             | 0.59                                                   | 0.950                                  | 0.085                                 | 0.087                                                   |
| 16-25 years                                              | 0.59                                                   | 0.897                                  | 0.047                                 | 0.070                                                   |
| >25 years                                                | 0.59                                                   | 0.904                                  | 0.057                                 | 0.067                                                   |
| Total                                                    | 0.59                                                   | 0.911                                  | 0.061                                 | 0.069                                                   |
| <b>Aga Khan University Hospital</b>                      |                                                        |                                        |                                       |                                                         |
| <2 years                                                 | 0.59                                                   | 0.950                                  | 0.141                                 | 0.182                                                   |
| 2 - 4 years                                              | 0.59                                                   | 0.927                                  | 0.092                                 | 0.118                                                   |
| 5 - 15 years                                             | 0.59                                                   | 0.945                                  | 0.066                                 | 0.095                                                   |
| 16-25 years                                              | 0.59                                                   | 0.958                                  | 0.076                                 | 0.098                                                   |
| >25 years                                                | 0.59                                                   | 0.969                                  | 0.147                                 | 0.191                                                   |
| Total                                                    | 0.59                                                   | 0.954                                  | 0.110                                 | 0.144                                                   |
| <b>Kharadar General Hospital</b>                         |                                                        |                                        |                                       |                                                         |
| <2 years                                                 | 0.59                                                   | 0.975                                  | 0.378                                 | 0.368                                                   |
| 2 - 4 years                                              | 0.59                                                   | 0.976                                  | 0.201                                 | 0.224                                                   |
| 5 - 15 years                                             | 0.59                                                   | 0.977                                  | 0.131                                 | 0.133                                                   |
| 16-25 years                                              | 0.59                                                   | 0.959                                  | 0.137                                 | 0.140                                                   |
| >25 years                                                | 0.59                                                   | 0.980                                  | 0.191                                 | 0.193                                                   |
| Total                                                    | 0.59                                                   | 0.975                                  | 0.184                                 | 0.187                                                   |

| <b>Inpatient</b>                                         |      |                         |       |       |
|----------------------------------------------------------|------|-------------------------|-------|-------|
| <b>Bangladesh</b>                                        |      |                         |       |       |
| <2 years                                                 | 0.59 | 0.989 DSH;<br>0.960 SSF | 0.613 | 0.619 |
| 2 - 4 years                                              | 0.59 | 0.988 DSH;<br>0.984 SSF | 0.613 | 0.619 |
| 5 - 15 years                                             | 0.59 | 0.991 DSH;<br>0.967 SSF | 0.613 | 0.619 |
| Total                                                    | 0.59 | 0.989 DSH;<br>0.972 SSF | 0.613 | 0.619 |
| <b>Dhulikhel Hospital, Kathmandu University Hospital</b> |      |                         |       |       |
| <2 years                                                 | 0.59 | NA                      | 0.350 | 0.636 |
| 2 - 4 years                                              | 0.59 | 1.000                   | 0.350 | 0.636 |
| 5 - 15 years                                             | 0.59 | 1.000                   | 0.350 | 0.636 |
| 16-25 years                                              | 0.59 | 0.933                   | 0.350 | 0.636 |
| >25 years                                                | 0.59 | 1.000                   | 0.350 | 0.636 |
| Total                                                    | 0.59 | 0.985                   | 0.350 | 0.636 |
| <b>Kathmandu Medical College and Teaching Hospital</b>   |      |                         |       |       |
| <2 years                                                 | 0.59 | 0.889                   | 0.167 | 0.091 |
| 2 - 4 years                                              | 0.59 | 0.867                   | 0.167 | 0.091 |
| 5 - 15 years                                             | 0.59 | 0.840                   | 0.167 | 0.091 |
| 16-25 years                                              | 0.59 | 0.725                   | 0.167 | 0.091 |
| >25 years                                                | 0.59 | 0.685                   | 0.167 | 0.091 |
| Total                                                    | 0.59 | 0.755                   | 0.167 | 0.091 |
| <b>Aga Khan University Hospital</b>                      |      |                         |       |       |
| <2 years                                                 | 0.59 | 1.000                   | 0.410 | 0.483 |
| 2 - 4 years                                              | 0.59 | 1.000                   | 0.410 | 0.483 |
| 5 - 15 years                                             | 0.59 | 0.995                   | 0.410 | 0.483 |
| 16-25 years                                              | 0.59 | 1.000                   | 0.410 | 0.483 |
| >25 years                                                | 0.59 | 0.994                   | 0.410 | 0.483 |
| Total                                                    | 0.59 | 0.997                   | 0.410 | 0.483 |
| <b>Kharadar General Hospital</b>                         |      |                         |       |       |
| <2 years                                                 | 0.59 | 0.990                   | 0.488 | 0.572 |
| 2 - 4 years                                              | 0.59 | 1.000                   | 0.488 | 0.572 |
| 5 - 15 years                                             | 0.59 | 0.974                   | 0.488 | 0.572 |
| 16-25 years                                              | 0.59 | 1.000                   | 0.488 | 0.572 |
| >25 years                                                | 0.59 | 0.989                   | 0.488 | 0.572 |
| Total                                                    | 0.59 | 0.989                   | 0.488 | 0.572 |

Supplementary Table 3. Typhoid and Paratyphoid incidence estimates by age group, study site, and adjustment factor, Surveillance for Enteric Fever in Asia Project (SEAP) — Bangladesh, Nepal, and Pakistan, 2016-2019

|                                                          | Population | Inpatient cases per Anum | Outpatient cases per Anum | Total Cases per Anum <sup>1</sup> | Crude Incidence <sup>1</sup> (95% CI) | Cases per Anum <sup>2</sup> | Unadjusted Incidence <sup>2</sup> (95% CI) | Incidence Estimates by Adjustment Factor n (95% CI) |                                                                |                                                                                   |                                                                                                                  |
|----------------------------------------------------------|------------|--------------------------|---------------------------|-----------------------------------|---------------------------------------|-----------------------------|--------------------------------------------|-----------------------------------------------------|----------------------------------------------------------------|-----------------------------------------------------------------------------------|------------------------------------------------------------------------------------------------------------------|
|                                                          |            |                          |                           |                                   |                                       |                             |                                            | Adjustment 1: Blood Culture Sensitivity             | Adjustments 1 and 2: Blood Culture Sensitivity + Study Consent | Adjustments 1, 2, and 3: Blood Culture Sensitivity + Study Consent + Care-seeking | Adjustments 1, 2, 3, and 4: Blood Culture Sensitivity + Study Consent + Care-seeking + Differential Care-Seeking |
| <b>Typhi</b>                                             |            |                          |                           |                                   |                                       |                             |                                            |                                                     |                                                                |                                                                                   |                                                                                                                  |
| <b>Bangladesh</b>                                        |            |                          |                           |                                   |                                       |                             |                                            |                                                     |                                                                |                                                                                   |                                                                                                                  |
| <2 years                                                 | 77,958     | 35                       | 41                        | 125                               | 160 (133 - 191)                       | 77                          | 98 (78 - 123)                              | 166 (153 - 182)                                     | 231 (213 - 252)                                                | 820 (675 - 1008)                                                                  | 780 (638 - 968)                                                                                                  |
| 2 - 4 years                                              | 173,878    | 80                       | 175                       | 376                               | 217 (195 - 239)                       | 256                         | 147 (130 - 166)                            | 249 (230 - 272)                                     | 344 (317 - 376)                                                | 1542 (1299 - 1842)                                                                | 1491 (1244 - 1804)                                                                                               |
| 5 - 15 years                                             | 588,070    | 85                       | 229                       | 549                               | 93 (86 - 101)                         | 314                         | 53 (48 - 60)                               | 90 (83 - 99)                                        | 124 (114 - 135)                                                | 1412 (1129 - 1773)                                                                | 1302 (1038 - 1642)                                                                                               |
| Total                                                    | 1,019,847  | 201                      | 445                       | 1050                              | 103 (97 - 109)                        | 646                         | 63 (59 - 68)                               | 107 (99 - 117)                                      | 150 (138 - 163)                                                | 963 (804 - 1160)                                                                  | 913 (765 - 1095)                                                                                                 |
| <b>Dhulikhel Hospital, Kathmandu University Hospital</b> |            |                          |                           |                                   |                                       |                             |                                            |                                                     |                                                                |                                                                                   |                                                                                                                  |
| <2 years                                                 | 1,789      | 0                        | 0                         | 1                                 | 37 (1 - 311)                          | 0                           | 18 (0 - 206)                               | 31 (29 - 34)                                        | 33 (31 - 36)                                                   | 234 (141 - 406)                                                                   | 156 (100 - 259)                                                                                                  |
| 2 - 4 years                                              | 3,392      | 0                        | 1                         | 1                                 | 19 (1 - 164)                          | 1                           | 19 (1 - 164)                               | 33 (30 - 36)                                        | 34 (31 - 37)                                                   | 179 (130 - 252)                                                                   | 159 (102 - 262)                                                                                                  |
| 5 - 15 years                                             | 14,746     | 0                        | 7                         | 9                                 | 60 (28 - 116)                         | 7                           | 45 (19 - 98)                               | 76 (70 - 82)                                        | 78 (72 - 86)                                                   | 638 (455 - 910)                                                                   | 570 (310 - 1124)                                                                                                 |
| 16-25 years                                              | 17,101     | 0                        | 6                         | 12                                | 67 (36 - 123)                         | 6                           | 37 (13 - 76)                               | 62 (57 - 68)                                        | 65 (60 - 71)                                                   | 494 (327 - 768)                                                                   | 406 (219 - 820)                                                                                                  |
| >25 years                                                | 46,967     | 0                        | 6                         | 9                                 | 18 (9 - 36)                           | 6                           | 13 (5 - 28)                                | 22 (21 - 25)                                        | 24 (22 - 26)                                                   | 274 (208 - 365)                                                                   | 172 (119 - 256)                                                                                                  |
| Total                                                    | 84,027     | 0                        | 20                        | 30                                | 36 (24 - 51)                          | 20                          | 24 (15 - 37)                               | 40 (37 - 44)                                        | 42 (39 - 46)                                                   | 356 (291 - 437)                                                                   | 268 (202 - 362)                                                                                                  |
| <b>Kathmandu Medical College and Teaching Hospital</b>   |            |                          |                           |                                   |                                       |                             |                                            |                                                     |                                                                |                                                                                   |                                                                                                                  |
| <2 years                                                 | 7857       | 0                        | 0                         | 1                                 | 8 (0 - 71)                            | 1                           | 8 (0 - 71)                                 | 14 (13 - 16)                                        | 16 (15 - 18)                                                   | 186 (103 - 376)                                                                   | 251 (120 - 613)                                                                                                  |
| 2 - 4 years                                              | 14,235     | 0                        | 1                         | 4                                 | 28 (8 - 72)                           | 1                           | 7 (0 - 39)                                 | 12 (11 - 13)                                        | 13 (12 - 14)                                                   | 192 (104 - 365)                                                                   | 227 (102 - 522)                                                                                                  |
| 5 - 15 years                                             | 67,268     | 1                        | 13                        | 31                                | 46 (31 - 65)                          | 14                          | 20 (11 - 35)                               | 34 (32 - 37)                                        | 36 (33 - 40)                                                   | 415 (255 - 694)                                                                   | 423 (228 - 826)                                                                                                  |
| 16-25 years                                              | 115,282    | 1                        | 27                        | 78                                | 68 (53 - 84)                          | 28                          | 24 (16 - 35)                               | 41 (38 - 45)                                        | 46 (42 - 50)                                                   | 959 (523 - 1799)                                                                  | 653 (313 - 1440)                                                                                                 |
| >25 years                                                | 243,297    | 0                        | 11                        | 27                                | 11 (7 - 16)                           | 11                          | 5 (2 - 8)                                  | 8 (7 - 9)                                           | 9 (8 - 10)                                                     | 149 (98 - 232)                                                                    | 130 (76 - 230)                                                                                                   |
| Total                                                    | 448,052    | 2                        | 52                        | 141                               | 31 (26 - 37)                          | 54                          | 12 (9 - 16)                                | 20 (19 - 22)                                        | 23 (21 - 25)                                                   | 359 (267 - 487)                                                                   | 330 (230 - 480)                                                                                                  |
| <b>Aga Khan University Hospital</b>                      |            |                          |                           |                                   |                                       |                             |                                            |                                                     |                                                                |                                                                                   |                                                                                                                  |
| <2 years                                                 | 31,851     | 5                        | 7                         | 14                                | 43 (24-74)                            | 12                          | 38 (19 - 66)                               | 65 (60 - 71)                                        | 67 (62 - 73)                                                   | 358 (244 - 555)                                                                   | 282 (191 - 449)                                                                                                  |
| 2 - 4 years                                              | 68,860     | 7                        | 15                        | 25                                | 36 (23-54)                            | 22                          | 31 (20 - 48)                               | 53 (49 - 58)                                        | 56 (52 - 61)                                                   | 471 (337 - 672)                                                                   | 371 (265 - 534)                                                                                                  |
| 5 - 15 years                                             | 251,289    | 14                       | 35                        | 62                                | 25 (19-32)                            | 49                          | 19 (14 - 26)                               | 33 (30 - 36)                                        | 34 (32 - 37)                                                   | 401 (290 - 561)                                                                   | 280 (201 - 397)                                                                                                  |
| 16-25 years                                              | 230,001    | 4                        | 19                        | 26                                | 11 (7 - 17)                           | 23                          | 10 (6 - 15)                                | 17 (15 - 18)                                        | 17 (16 - 19)                                                   | 195 (134 - 287)                                                                   | 152 (103 - 230)                                                                                                  |
| >25 years                                                | 593,701    | 4                        | 13                        | 20                                | 3 (2 - 5)                             | 17                          | 3 (2 - 5)                                  | 5 (4 - 5)                                           | 5 (5 - 5)                                                      | 29 (23 - 36)                                                                      | 22 (18 - 28)                                                                                                     |
| Total                                                    | 1,175,701  | 33                       | 88                        | 137                               | 12 (10 -14)                           | 122                         | 10 (9 - 12)                                | 18 (16 - 19)                                        | 18 (17 - 20)                                                   | 134 (110 - 163)                                                                   | 103 (85 - 126)                                                                                                   |
| <b>Kharadar General Hospital</b>                         |            |                          |                           |                                   |                                       |                             |                                            |                                                     |                                                                |                                                                                   |                                                                                                                  |
| <2 years                                                 | 19,941     | 4                        | 24                        | 35                                | 175 (122 - 244)                       | 28                          | 139 (93 - 203)                             | 235 (217 - 257)                                     | 241 (222 - 263)                                                | 620 (500 - 792)                                                                   | 628 (470 - 889)                                                                                                  |
| 2 - 4 years                                              | 45,879     | 11                       | 49                        | 67                                | 146 (113 - 185)                       | 60                          | 130 (100 - 168)                            | 221 (203 - 241)                                     | 225 (208 - 246)                                                | 1008 (788 - 1312)                                                                 | 901 (662 - 1269)                                                                                                 |

|              |                 |           |            |            |                     |            |                     |                     |                     |                        |                        |
|--------------|-----------------|-----------|------------|------------|---------------------|------------|---------------------|---------------------|---------------------|------------------------|------------------------|
| 5 - 15 years | 170,998         | 6         | 44         | 49         | 29 (21 - 38)        | 49         | 29 (21 - 38)        | 49 (45 - 53)        | 50 (46 - 55)        | 349 (270 - 457)        | 344 (249 - 483)        |
| 16-25 years  | 139,382         | 1         | 4          | 5          | 3 (1 - 8)           | 5          | 3 (1 - 8)           | 6 (5 - 6)           | 6 (6 - 6)           | 37 (26 - 54)           | 36 (24 - 57)           |
| >25 years    | 311,064         | 1         | 2          | 3          | 1 (0 - 3)           | 3          | 1 (0 - 3)           | 2 (2 - 2)           | 2 (2 - 2)           | 8 (6 - 10)             | 8 (6 - 10)             |
| <b>Total</b> | <b>6,872,65</b> | <b>22</b> | <b>123</b> | <b>168</b> | <b>24 (21 - 28)</b> | <b>144</b> | <b>21 (18 - 25)</b> | <b>36 (33 - 39)</b> | <b>36 (34 - 40)</b> | <b>180 (154 - 210)</b> | <b>176 (144 - 216)</b> |

### Paratyphi

#### Bangladesh

|              |                  |           |           |            |                     |           |                   |                     |                     |                        |                        |
|--------------|------------------|-----------|-----------|------------|---------------------|-----------|-------------------|---------------------|---------------------|------------------------|------------------------|
| <2 years     | 77,958           | 3         | 5         | 17         | 22 (13 - 35)        | 8         | 10 (4 - 20)       | 17 (16 - 19)        | 23 (22 - 25)        | 86 (70 - 106)          | 81 (66 - 101)          |
| 2 - 4 years  | 173,878          | 9         | 23        | 54         | 31 (23 - 41)        | 32        | 18 (13 - 26)      | 31 (29 - 34)        | 43 (39 - 47)        | 194 (164 - 233)        | 188 (157 - 228)        |
| 5 - 15 years | 588,070          | 9         | 37        | 89         | 15 (12 - 19)        | 46        | 8 (6 - 10)        | 13 (12 - 14)        | 19 (17 - 20)        | 225 (180 - 283)        | 208 (165 - 262)        |
| <b>Total</b> | <b>1,019,847</b> | <b>22</b> | <b>64</b> | <b>161</b> | <b>16 (13 - 18)</b> | <b>86</b> | <b>8 (7 - 10)</b> | <b>14 (13 - 16)</b> | <b>20 (19 - 22)</b> | <b>135 (113 - 163)</b> | <b>128 (107 - 154)</b> |

#### Dhulikhel Hospital, Kathmandu University Hospital

|              |               |          |          |          |                   |          |                   |                  |                  |                     |                     |
|--------------|---------------|----------|----------|----------|-------------------|----------|-------------------|------------------|------------------|---------------------|---------------------|
| <2 years     | 1,789         | 0        | 0        | 0        | NA                | 0        | NA                | NA               | NA               | NA                  | NA                  |
| 2 - 4 years  | 3,392         | 0        | 0        | 0        | 10 (0 - 109)      | 0        | NA                | NA               | NA               | NA                  | NA                  |
| 5 - 15 years | 14,746        | 0        | 1        | 1        | 9 (0 - 38)        | 1        | 9 (0 - 38)        | 15 (14 - 16)     | 16 (14 - 17)     | 128 (91 - 182)      | 114 (62 - 224)      |
| 16-25 years  | 17,101        | 0        | 2        | 3        | 17 (4 - 51)       | 2        | 12 (1 - 42)       | 20 (18 - 21)     | 21 (19 - 22)     | 144 (98 - 221)      | 117 (65 - 233)      |
| >25 years    | 46,967        | 0        | 0        | 1        | 3 (0 - 12)        | 0        | 1 (0 - 8)         | 1 (1 - 1)        | 1 (1 - 1)        | 14 (11 - 19)        | 9 (6 - 14)          |
| <b>Total</b> | <b>84,027</b> | <b>0</b> | <b>3</b> | <b>6</b> | <b>7 (3 - 16)</b> | <b>4</b> | <b>4 (1 - 12)</b> | <b>7 (7 - 8)</b> | <b>8 (7 - 8)</b> | <b>61 (50 - 75)</b> | <b>46 (34 - 62)</b> |

#### Kathmandu Medical College and Teaching Hospital

|              |                |          |           |           |                  |           |                  |                  |                  |                      |                      |
|--------------|----------------|----------|-----------|-----------|------------------|-----------|------------------|------------------|------------------|----------------------|----------------------|
| <2 years     | 7,857          | 0        | 0         | 1         | 9 (0 - 71)       | 0         | NA               | NA               | NA               | NA                   | NA                   |
| 2 - 4 years  | 14,235         | 0        | 1         | 1         | 9 (0 - 39)       | 1         | 7 (0 - 39)       | 12 (11 - 13)     | 13 (12 - 14)     | 192 (104 - 365)      | 227 (103 - 521)      |
| 5 - 15 years | 67,268         | 1        | 1         | 4         | 7 (2 - 15)       | 2         | 3 (0 - 11)       | 5 (5 - 6)        | 6 (5 - 6)        | 54 (36 - 84)         | 66 (35 - 153)        |
| 16-25 years  | 115,282        | 0        | 7         | 14        | 12 (7 - 20)      | 7         | 6 (2 - 13)       | 11 (10 - 12)     | 12 (11 - 13)     | 255 (138 - 479)      | 169 (79 - 381)       |
| >25 years    | 243,297        | 0        | 3         | 7         | 3 (1 - 6)        | 3         | 1 (0 - 4)        | 2 (2 - 2)        | 2 (2 - 2)        | 40 (26 - 63)         | 34 (20 - 61)         |
| <b>Total</b> | <b>448,052</b> | <b>1</b> | <b>13</b> | <b>28</b> | <b>6 (4 - 9)</b> | <b>13</b> | <b>3 (2 - 5)</b> | <b>5 (5 - 6)</b> | <b>6 (5 - 6)</b> | <b>87 (65 - 118)</b> | <b>81 (56 - 118)</b> |

#### Aga Khan University Hospital

|              |                  |          |           |           |                  |           |                  |                  |                  |                     |                     |
|--------------|------------------|----------|-----------|-----------|------------------|-----------|------------------|------------------|------------------|---------------------|---------------------|
| <2 years     | 31,851           | 0        | 0         | 0         | 1 (0 - 12)       | 0         | 1 (0 - 12)       | 2 (2 - 2)        | 2 (2 - 2)        | 13 (8 - 22)         | 10 (6 - 18)         |
| 2 - 4 years  | 68,860           | 0        | 2         | 2         | 4 (0 - 10)       | 2         | 2 (0 - 10)       | 4 (4 - 4)        | 4 (4 - 5)        | 49 (34 - 71)        | 38 (26 - 56)        |
| 5 - 15 years | 251,289          | 1        | 5         | 9         | 3 (2 - 7)        | 6         | 3 (1 - 5)        | 4 (4 - 5)        | 4 (4 - 5)        | 60 (43 - 85)        | 42 (30 - 60)        |
| 16-25 years  | 230,001          | 1        | 7         | 10        | 4 (2 - 8)        | 9         | 4 (2 - 7)        | 6 (6 - 7)        | 7 (6 - 7)        | 77 (53 - 114)       | 60 (41 - 92)        |
| >25 years    | 593,701          | 1        | 6         | 9         | 2 (1 - 3)        | 7         | 1 (0 - 2)        | 2 (2 - 2)        | 2 (2 - 2)        | 13 (11 - 17)        | 10 (8 - 13)         |
| <b>Total</b> | <b>1,175,701</b> | <b>3</b> | <b>21</b> | <b>31</b> | <b>3 (2 - 4)</b> | <b>24</b> | <b>2 (1 - 3)</b> | <b>4 (3 - 4)</b> | <b>4 (3 - 4)</b> | <b>30 (25 - 37)</b> | <b>23 (19 - 29)</b> |

#### Kharadar General Hospital

|              |                |          |          |          |                  |          |                  |                  |                  |                  |                  |
|--------------|----------------|----------|----------|----------|------------------|----------|------------------|------------------|------------------|------------------|------------------|
| <2 years     | 19,941         | 0        | 0        | 1        | 4 (0 - 28)       | 0        | 2 (0 - 18)       | 3 (3 - 3)        | 3 (3 - 3)        | 8 (6 - 10)       | 8 (6 - 12)       |
| 2 - 4 years  | 45,879         | 0        | 0        | 0        | 1 (0 - 8)        | 0        | 1 (0 - 8)        | 1 (1 - 1)        | 1 (1 - 1)        | 6 (5 - 8)        | 6 (4 - 8)        |
| 5 - 15 years | 170,998        | 0        | 0        | 0        | 0 (0 - 2)        | 0        | NA               | NA               | NA               | NA               | NA               |
| <b>Total</b> | <b>687,265</b> | <b>0</b> | <b>1</b> | <b>1</b> | <b>0 (0 - 1)</b> | <b>1</b> | <b>0 (0 - 1)</b> | <b>0 (0 - 0)</b> | <b>0 (0 - 0)</b> | <b>1 (1 - 1)</b> | <b>1 (1 - 1)</b> |

CI: Confidence interval. NA: Not applicable.

<sup>1</sup> Includes laboratory cases

<sup>2</sup> Inpatient and outpatient cases

Example calculation: The fully adjusted typhi incidence for Kharadar General Hospital <2 can be calculated as:  
[3.7 (Inpatient cases) / .59 (culture sensitivity) / .990 (inpatient consent) / .572 (differential care-seeking)] +  
[ 24 (Outpatient cases) / .59 (culture sensitivity) / .975 (outpatient consent) / .368 (differential care-seeking)] /  
19,941 (Catchment area population) \*100000

---

<sup>i</sup> Antillon M, Saad NJ, Baker S, Pollard AJ, Pitzer VE. The relationship between blood sample volume and diagnostic sensitivity of blood culture for typhoid and paratyphoid fever: a systematic review and meta-analysis. *The Journal of Infectious Diseases*. 2018 Nov 10;218(suppl\_4):S255-67.

<sup>ii</sup> Hanley, James A., Abdissa Negassa, Michael D. deB Edwardes, and Janet E. Forrester. "Statistical analysis of correlated data using generalized estimating equations: an orientation." *American Journal of Epidemiology* 157, no. 4 (2003): 364-375.

<sup>iii</sup> Vyas: Constructing socio-economic status indices: how to use principal components analysis. <https://academic.oup.com/heapol/article/21/6/459/612115>
